1 PhaeoEpiView: An epigenome browser of the newly assembled genome of the model diatom  
2 *Phaeodactylum tricornutum*

3

4 Yue Wu<sup>1‡</sup>, Chaumier Timothée<sup>1‡</sup>, Eric Manirakiza<sup>1</sup>, Alaguraj Veluchamy<sup>2</sup> and Leila Tirichine<sup>1\*</sup>

5 <sup>1</sup>Nantes Université, CNRS, US2B, UMR 6286, F-44000 Nantes, France

6

7 <sup>2</sup>St Jude Children's Research Hospital, Memphis, TN, US

8

9

10 <sup>‡</sup>Equal contribution

11

12

13 \*Correspondence: [tirichine-l@univ-nantes.fr](mailto:tirichine-l@univ-nantes.fr); Tel.: +33-276645058

14

15 **Abstract**

16 **Motivation**

17 Recent advances in DNA sequencing technologies in particular of long reads type greatly  
18 improved genomes assembly leading to discrepancies between both published annotations and  
19 epigenome tracks which did not keep pace with new assemblies. This comprises the availability  
20 of accurate resources which penalizes the progress in research.

21 **Results**

22 Here, we used the latest improved telomere to telomere assembly of the model pennate diatom  
23 *Phaeodactylum tricornutum* to lift over the gene models from Phatr3, a previously annotated  
24 reference genome. We used the lifted genome annotation including genes and transposable  
25 elements to map the epigenome landscape, namely DNA methylation and post translational  
26 modifications of histones providing the community with PhaeoEpiView, a browser that allows  
27 the visualization of epigenome data as well as transcripts on an updated reference genome to  
28 better understand the biological significance of the mapped data on contiguous genome rather  
29 than a fragmented one. We updated previously published histone marks with a more accurate  
30 mapping using monoclonal antibodies instead of polyclonal and deeper sequencing.  
31 PhaeoEpiView will be continuously updated with the newly published epigenomic data making  
32 it the largest and richest epigenome browser of any stramenopile. We expect that PhaeoEpiView  
33 will be a standard tool for the coming era of molecular environmental studies where epigenetics  
34 holds a place of choice.

35 **Availability**

36 PhaeoEpiView is available at: <https://PhaeoEpiView.univ-nantes.fr>

## 37 **Introduction**

38       The genome of the model diatom *Phaeodactylum tricornutum* CCAP 1055/1 and the  
39 corresponding annotation were published in 2008 using whole genome shotgun paired-end  
40 Sanger sequencing (NCBI assembly ASM15095v2) (Bowler et al., 2008). Subsequently, Phatr3  
41 annotation updated gene repertoire to introduce more than thousand novel genes and performed  
42 a comprehensive de novo annotation of repetitive elements showing novel classes of  
43 transposable elements using 90 RNA-Seq datasets combined with published expressed  
44 sequence tags and protein sequences (Rastogi et al., 2018). The first assembly of the genome  
45 contained 33 scaffolds among which 12 telomere-to-telomere chromosomes. Using long read  
46 sequencing, Filloramo et al., re-examined *P. tricornutum* assembly which led to additional  
47 sequence information but did not improve the continuity and chromosome-level scaffolds  
48 compared to the original reference genome (Filloramo et al., 2021). Recently, an approach  
49 combining long reads from the Oxford Nanopore minION platform and short high accurate  
50 reads from the Illumina NextSeq platform was used to perform a new assembly of *P.*  
51 *tricornutum* genome which led to 25 nuclear chromosomes improving thus the assembly  
52 (Giguere, 2021). However, Phatr3 annotation of *P. tricornutum* was not revisited in light of the  
53 new 25 telomeric chromosomes assembly which is often observed for most species where the  
54 annotations do not keep pace with new/improved assemblies.

55

56       *P. tricornutum* is an established model diatom widely used by an increasing community  
57 for fundamental research and biotech applications. Diatoms are one of the most abundant and  
58 highly diverse mostly photosynthetic eukaryotes, contributing to 20-25% of the Earth's global  
59 carbon dioxide fixation (Field et al., 1998) and their photosynthetic activity accounts for about  
60 40% of the marine primary production (Armbrust, 2009; Falkowski et al., 1998). Diatoms are  
61 highly successful and widely spread occupying large territories including marine, freshwater,  
62 sea ice, snow and even moist terrestrial habitats.

63

64       While whole-genome sequencing is critical to better understanding the ecological success  
65 of diatoms, primary sequence is only the basis for understanding how to read genetic programs,  
66 another layer of heritable information superimposed on the DNA sequence is epigenetic  
67 information. It has already been proposed that the ecological success of phytoplankton is also  
68 due to the adaptive dynamics conferred by epigenetic regulation mechanisms because point  
69 mutation-based processes may be too slow to permit adaptation to a dynamic ocean

70 environment (Tirichine and Bowler, 2011). The epigenetic changes may lead to chromatin  
71 modifications, which may cause a stable alteration in transcriptional activity even after  
72 withdrawal of the triggering stress (Avramova, 2015). Pioneering work drew a comprehensive  
73 map of epigenetic marks including several permissive and repressive PTMs and DNA  
74 methylation in *P. tricornutum* and showed their contribution to mediate the response of diatom  
75 cells to environmental factors (Rastogi et al., 2015; Veluchamy et al., 2013; Veluchamy et al.,  
76 2015).

77 An important molecular tool box is available in *P. tricornutum* including epigenomic data  
78 which are only found in the partial assembly. To make such a resource available on the newly  
79 assembled genome, we used the new 25 to 25 telomere assembly to map the epigenetic data  
80 including Post-translational modifications of histones (PTMs) and DNA methylation that were  
81 previously published (Hoguin, 2021; Veluchamy *et al.*, 2013; Veluchamy *et al.*, 2015). Prior to  
82 this, we lifted the Phatr3 annotation using a gene based approach.

### 83 **Implementation**

84 PhaeoEpiView was built using two steps (i) Phatr3 gene annotation lifting onto the new  
85 25 chromosomes assembly (Phatr4) (ii) mapping of the previously published epigenetic marks  
86 and transcripts on the new assembly. For more accuracy and homogeneity of the used data,  
87 chromatin immunoprecipitation with deep sequencing was carried out using monoclonal  
88 antibodies to replace two marks, H3K9me3 and H3K27me3 for which polyclonal antibodies  
89 were used in the previous study.

90  
91 In the first step, instead of whole genome-based comparison, we adapted a gene-based  
92 sequence alignment for lifting the annotation from Phatr3 to Phatr4 assembly. Features such as  
93 mRNA, CDS and exons from the reference Phatr3 were used to infer genes and transcripts in  
94 target assembly. Using minimap2 and Liftoff tools, exons are aligned first to preserve the gene  
95 structure of the Phatr3 annotation (Li, 2018; Shumate, 2021). Minimap is used with 50  
96 secondary mappings, end bonus of 5 and chaining score of 0.5. Genes are lifted and considered  
97 mapped successfully if the alignment coverage and sequence identity in the child features  
98 (usually exons/CDS) is  $\geq 50\%$ . Unplaced genes and genes with extra copy number are tagged  
99 and separated (Supplementary Table 1). Out of the 12178 genes from Phatr3 annotation, 11739  
100 were lifted successfully (Supplementary File 2).

101

102 In order to validate the lifted annotation, we aligned RNAseq reads to both the previous  
103 and the new genome version then compared every gene quantification. The vast majority of  
104 them had a difference of quantification (Supplementary Figure 1) and length lower than  
105 +/- 0.1% between Phatr3 and Phatr3\_lift (Phatr4). Missing genes were then examined: 178 out  
106 of 439 (40%) were found to be located on short regions that are no longer present in Phatr4  
107 assembly according to whole-genome alignment provided in (Giguere, 2021), half of them  
108 clustered on previous chr\_5 and chr\_21 (Supplementary Table 1). Most of the remaining 261  
109 missing genes showed similarity to already lifted genes suggesting that they are either  
110 duplicated or allelic.

111

112 In the second step, transposable elements annotation available from (Giguere, 2021) was  
113 added to PhaeoEpiView as Phatr4 TEs track. Finally, previously published expression data at  
114 two different time points, DNA methylation and PTMs tracks were implemented in the browser  
115 and systematic comparison was made with the previous assembly mapping using unchanged  
116 regions as anchors (Supplementary File 1). PhaeoEpiView was implemented as a Jbrowse2  
117 instance (Buels et al., 2016) and made public on a virtual machine hosted at Nantes University  
118 datacenter. It can currently display one track for each of the genes, TEs, transcript levels,  
119 McrBC and Bisulfite-seq DNA methylation and five histone PTMs (H3K9/14Ac, H3K4me2,  
120 H3K4me3, H3K9me2, H3K9me3, H3K27me3). The browser will be regularly updated with  
121 relevant epigenomic data when published in the future, making PhaeoEpiView a live platform  
122 for a comprehensive genomic and epigenomic resource of the model microalgae *P. triornutum*.  
123

## 124 **Conclusion**

125 PhaeoEpiView is an open source browser that provides an up to date genome and  
126 epigenome view of the model diatom *Phaeodactylum triornutum*. With the lifted genes  
127 annotation, the epigenome and transcriptome landscapes can be visualized on a fully assembled  
128 genome providing an accurate view of epigenetic regulation of genes and TEs which was  
129 incomplete on the previously fragmented genome. PhaeoEpiView allows users to upload their  
130 own tracks in private session for visualization and data interpretation purposes. PhaeoEpiView  
131 is intuitive, easy to use and represent the first epigenome browser of a photosynthetic unicellular  
132 species which will undoubtedly contribute to boost research in microalgae and single celled  
133 species in general.

## 134 **Acknowledgements**

135 This work was supported by the Epicycle ANR project (ANR-19-CE20-0028-02) and Région  
136 Pays de la Loire (ConnecTalent EPIALG project) to LT. YW was supported by a PhD  
137 fellowship from the Chinese Scholarship Council (CSC-201908340073). We are grateful to the  
138 Bioinformatics Core Facility of Nantes University (BiRD-Biogenouest) for its technical  
139 support.

## 140 **References**

- 141 Armbrust, E.V. (2009). The life of diatoms in the world's oceans. *Nature* *459*, 185-192.  
142 [10.1038/nature08057](https://doi.org/10.1038/nature08057).
- 143 Bowler, C., Allen, A.E., Badger, J.H., Grimwood, J., Jabbari, K., Kuo, A., Maheswari, U.,  
144 Martens, C., Maumus, F., Otilar, R.P., et al. (2008). The Phaeodactylum genome reveals the  
145 evolutionary history of diatom genomes. *Nature* *456*, 239-244. [nature07410 \[pii\]](https://doi.org/10.1038/nature07410)  
146 [10.1038/nature07410](https://doi.org/10.1038/nature07410).
- 147 Falkowski, P.G., Barber, R.T., and Smetacek, V.V. (1998). Biogeochemical Controls and  
148 Feedbacks on Ocean Primary Production. *Science* *281*, 200-207.
- 149 Field, C.B., Behrenfeld, M.J., Randerson, J.T., and Falkowski, P. (1998). Primary production  
150 of the biosphere: integrating terrestrial and oceanic components. *Science* *281*, 237-240.
- 151 Filloramo, G.V., Curtis, B.A., Blanche, E., and Archibald, J.M. (2021). Re-examination of two  
152 diatom reference genomes using long-read sequencing. *BMC Genomics* *22*, 379.  
153 [10.1186/s12864-021-07666-3](https://doi.org/10.1186/s12864-021-07666-3).
- 154 Giguere, D.J., Bahcheli, A.T., Slattery, S.S., Patel, R.R., Flatley, M., Karas, B.J., Edgell, D.R.,  
155 Gloor, G.B. (2021). Telomere-to-telomere genome assembly of *Phaeodactylum tricorutum*.  
156 doi: <https://doi.org/10.1101/2021.05.04.442596>.
- 157 Huang, R., Ding, J., Gao, K., Cruz de Carvalho, M.H., Tirichine, L., Bowler, C., and Lin, X.  
158 (2018). A Potential Role for Epigenetic Processes in the Acclimation Response to Elevated  
159 pCO<sub>2</sub> in the Model Diatom *Phaeodactylum tricorutum*. *Front Microbiol* *9*, 3342.  
160 [10.3389/fmicb.2018.03342](https://doi.org/10.3389/fmicb.2018.03342).
- 161 Li, H. (2018). Minimap2: pairwise alignment for nucleotide sequences. *Bioinformatics* *34*,  
162 3094-3100. [10.1093/bioinformatics/bty191](https://doi.org/10.1093/bioinformatics/bty191).
- 163 Rastogi, A., Maheswari, U., Dorrell, R.G., Vieira, F.R.J., Maumus, F., Kustka, A., McCarthy,  
164 J., Allen, A.E., Kersey, P., Bowler, C., and Tirichine, L. (2018). Integrative analysis of large  
165 scale transcriptome data draws a comprehensive landscape of *Phaeodactylum tricorutum*  
166 genome and evolutionary origin of diatoms. *Sci Rep* *8*, 4834. [10.1038/s41598-018-23106-x](https://doi.org/10.1038/s41598-018-23106-x).
- 167 Shumate, A.a.S., S.L. (2021). Liftoff: Accurate Mapping of Gene Annotations. *Bioinformatics*  
168 *37*, 1639–1643.
- 169 Veluchamy, A., Lin, X., Maumus, F., Rivarola, M., Bhavsar, J., Creasy, T., O'Brien, K.,  
170 Sengamalay, N.A., Tallon, L.J., Smith, A.D., et al. (2013). Insights into the role of DNA  
171 methylation in diatoms by genome-wide profiling in *Phaeodactylum tricorutum*. *Nat Commun*  
172 *4*. [10.1038/ncomms3091](https://doi.org/10.1038/ncomms3091).
- 173 Veluchamy, A., Rastogi, A., Lin, X., Lombard, B., Murik, O., Thomas, Y., Dingli, F., Rivarola,  
174 M., Ott, S., Liu, X., et al. (2015). An integrative analysis of post-translational histone  
175 modifications in the marine diatom *Phaeodactylum tricorutum*. *Genome Biol* *16*, 102.  
176 [10.1186/s13059-015-0671-8](https://doi.org/10.1186/s13059-015-0671-8).

177 Buels, R., Yao, E., Diesh, C.M., Hayes, R.D., Munoz-Torres, M., Helt, G., Goodstein, D.M.,  
178 Elsik, C.G., Lewis, S.E., Stein, L., and Holmes, I.H. (2016). JBrowse: a dynamic web platform  
179 for genome visualization and analysis. *Genome Biol* 17, 66. 10.1186/s13059-016-0924-1.  
180 Giguere, D.J., Bahcheli, A.T., Slattery, S.S., Patel, R.R., Flatley, M., Karas, B.J., Edgell, D.R.,  
181 Gloo, G.B. (2021). Telomere-to-telomere genome assembly of *Phaeodactylum tricorutum*.  
182 doi: <https://doi.org/10.1101/2021.05.04.442596>.  
183 Huguin, A., Ait Mohamed, O., Bowler, C., Genovesio, A., Vieira, F.R.J., Tirichine, L. (2021).  
184 Evolutionary analysis of DNA methyltransferases in microeukaryotes: Insights from the model  
185 diatom *Phaeodactylum tricorutum*. bioRxiv, doi: <https://doi.org/10.1101/2021.06.11.447926>.  
186 Rastogi, A., Lin, X., Lombard, B., Loew, D., and Tirichine, L. (2015). Probing the evolutionary  
187 history of epigenetic mechanisms: What can we learn from marine diatoms. *AIMS Genetics* 2,  
188 173-191. 10.3934/genet.2015.3.173.  
189 Tirichine, L., and Bowler, C. (2011). Decoding algal genomes: tracing back the history of  
190 photosynthetic life on Earth. *Plant J* 66, 45-57. 10.1111/j.1365-313X.2011.04540.x.  
191 Veluchamy, A., Lin, X., Maumus, F., Rivarola, M., Bhavsar, J., Creasy, T., O'Brien, K.,  
192 Sengamalay, N.A., Tallon, L.J., Smith, A.D., et al. (2013). Insights into the role of DNA  
193 methylation in diatoms by genome-wide profiling in *Phaeodactylum tricorutum*. *Nat Commun*  
194 4. 10.1038/ncomms3091.  
195 Veluchamy, A., Rastogi, A., Lin, X., Lombard, B., Murik, O., Thomas, Y., Dingli, F., Rivarola,  
196 M., Ott, S., Liu, X., et al. (2015). An integrative analysis of post-translational histone  
197 modifications in the marine diatom *Phaeodactylum tricorutum*. *Genome Biol* 16, 102.  
198 10.1186/s13059-015-0671-8.

199

## 200 **Supplementary methods**

201

### 202 **Culture and growth conditions**

203 *Phaeodactylum tricorutum* Bohlin Clone Pt1 8.6 (CCMP2561) cells were obtained from the  
204 culture collection of the Provasoli-Guillard National Center for Culture of Marine  
205 Phytoplankton (Bigelow Laboratory for Ocean Sciences, USA). Constantly shaken (100 rpm)  
206 cultures were grown at 19°C, 60  $\mu\text{mol photons m}^{-2} \text{ s}^{-1}$  and with a 12h light / 12h dark  
207 photoperiod in sterile Enhanced Artificial Sea Water (EASW) medium (Vartanian, et al., 2009).  
208 For Chromatin immunoprecipitation-sequencing, cultures were seeded at 50.000 cells/ml in  
209 duplicate and grown side by side in 1000 ml erlens until early-exponential at  $10^6$  cells/ml.  
210 Culture growth was measured using a hematocytometer (Fisher Scientific, Pittsburgh, PA,  
211 USA).

212

### 213 **Chromatin extraction and immunoprecipitation**

214 Chromatin isolation was performed as described previously (Lin, et al., 2012) with few  
215 modifications. Briefly, the incubation step in buffer II is repeated several times until the pellet  
216 becomes white. Each ChIP-seq experiment was conducted in two independent biological  
217 replicates. Monoclonal antibodies from Cell Signaling Technology were used for



218 immunoprecipitation, H3K9me3 (13969), and H3K27me3 (9733).

219

## 220 **ChIP-Seq analysis**

221 Pair-end sequencing of H3K9me3 and H3K27me3 ChIP and input samples was performed on  
222 Illumina NovaSeq platform with read length of 2 x 150 bp. Previously published ChIP  
223 sequencing for H3K9me2, H3K9me3, H3K4me2, H3K27me3, H3K9/K14Ac and H3K4me3  
224 were retrieved from NCBI's Gene Expression Omnibus accessions GSE68513 and GSE139676  
225 (Veluchamy, et al., 2015; Zhao, et al., 2021). Raw reads were filtered and low-quality read pairs  
226 were discarded using Trim Galore 0.6.7 (<https://doi.org/10.5281/zenodo.5127899>) with a read  
227 quality (Phred score) cutoff of 20 and a stringency value of 3bp. Using the 25 to 25 telomere  
228 assembly published in 2021 as a reference genome, the filtered reads were mapped using  
229 Bowtie2 2.4.5 (Langmead and Salzberg, 2012). We then performed the processing and filtering  
230 of the alignments using Samtools 1.15 "fixmate -m" and "markdup -r" modules (Danecek, et  
231 al., 2021). Two biological replicates for each ChIP were performed and read counts showed a  
232 good Pearson correlation by Deeptools multiBamSummary v3.5.1 with a bin size of 1000bp  
233 (Ramirez, et al., 2014). To identify regions that were significantly enriched, we used MACS2  
234 v2.2.7.1 (Zhang, et al., 2008) on the combination of the two replicates with "callpeak --qvalue  
235 0.05 --nomodel --SPMR --bdg" options. In addition, extension size was set to the arithmetic  
236 mean of the two IP replicates fragment size for each mark, as determined by MACS2 predicted  
237 module with "-m 2 70" MFOLD value. Furthermore, "--broad" calling mode was activated for  
238 H3K9me2 and H3K9me3 that were previously described as broad histone marks. For the  
239 narrow marks H3K4me2, H3K9/K14Ac and H3K4me3, peaks summits were called with "--  
240 call-summits". Following previously published work, SICER2 v1.0.3 (Zang, et al., 2009) was  
241 used with "-w 200 -g 600 -fdr 0.05" to call peaks for H3K27me3.

242 Output normalized Fold Enrichment signal files were generated with MACS2 "bdgcmp"  
243 module and transformed to BigWig using Deeptools bedGraphToBigWig. Then, Pearson  
244 correlation between our new data and previously published data for H3K9me3 and H3K27me3  
245 was performed using Deeptools plotCorrelation.

246

## 247 **Expression analysis**

248 Early and late exponential growth phase Illumina RNA-seq data (SRR5274697, SRR5274696,  
249 SRR5274695 and SRR5274694) from (Murik, et al., 2019) were trimmed using Trim Galore  
250 0.6.7 with a read quality (Phred score) cutoff of 20 and a stringency value of 3bp. Technical  
251 replicates were merged and mapped to the reference assembly with STAR 2.7.10a



252 (<https://www.ncbi.nlm.nih.gov/pubmed/23104886>). Primary alignments only were processed  
253 with Deeptools bamCoverage 3.5.0 with “--normalizeUsing BPM --ignoreDuplicates --  
254 centerReads” to generate normalized coverage files to be displayed in PhaeoEpiView.

255

### 256 **DNA methylation analysis**

257 McrBC DNA methylation annotation data from  
258 (<https://www.nature.com/articles/ncomms3091>) was lifted from the previous assembly to the  
259 new 25 chromosomes using Liftoff. Bisulfite sequencing data (Hoguin, 2021) were processed  
260 with Bismark v0.22.3 (<https://pubmed.ncbi.nlm.nih.gov/21493656/>) and methylated regions  
261 having less than 50% methylated reads or less than 5 supporting reads were filtered out.

262

263

### 264 **References**

265

- 266 Danecek, P., *et al.* Twelve years of SAMtools and BCFtools. *Gigascience* 2021;10(2).
- 267 Hoguin, A., Ait Mohamed, O., Bowler, C., Genovesio, A., Vieira, F.R.J., Tirichine, L.  
268 Evolutionary analysis of DNA methyltransferases in microeukaryotes: Insights from the model  
269 diatom *Phaeodactylum tricornutum*. *bioRxiv*, doi: <https://doi.org/10.1101/2021.06.11.447926>  
270 2021.
- 271 Langmead, B. and Salzberg, S.L. Fast gapped-read alignment with Bowtie 2. *Nat Methods*  
272 2012;9(4):357-359.
- 273 Lin, X., Tirichine, L. and Bowler, C. Protocol: Chromatin immunoprecipitation (ChIP)  
274 methodology to investigate histone modifications in two model diatom species. *Plant methods*  
275 2012;8(1):48.
- 276 Murik, O., *et al.* Downregulation of mitochondrial alternative oxidase affects chloroplast  
277 function, redox status and stress response in a marine diatom. *New Phytol* 2019;221(3):1303-  
278 1316.
- 279 Ramirez, F., *et al.* deepTools: a flexible platform for exploring deep-sequencing data. *Nucleic*  
280 *Acids Res* 2014;42(Web Server issue):W187-191.
- 281 Vartanian, M., *et al.* Plasticity and robustness of pattern formation in the model diatom  
282 *Phaeodactylum tricornutum*. *The New phytologist* 2009;182(2):429-442.
- 283 Veluchamy, A., *et al.* An integrative analysis of post-translational histone modifications in the  
284 marine diatom *Phaeodactylum tricornutum*. *Genome Biol* 2015;16:102.
- 285 Zang, C., *et al.* A clustering approach for identification of enriched domains from histone

286 modification ChIP-Seq data. *Bioinformatics* 2009;25(15):1952-1958.  
287 Zhang, Y., *et al.* Model-based analysis of ChIP-Seq (MACS). *Genome Biol* 2008;9(9):R137.  
288 Zhao, X., *et al.* Genome wide natural variation of H3K27me3 selectively marks genes predicted  
289 to be important for cell differentiation in *Phaeodactylum tricornutum*. *New Phytol*  
290 2021;229(6):3208-3220.

291

292

293

## 294 **Legend**

295

296 **Figure 1.** Snapshot of PhaeoEpiView browser illustrating the different tracks of genes,  
297 transposable elements, histone marks and DNA methylation. Both peaks and log<sub>2</sub> fold  
298 enrichment between IP and Input are displayed for H3K27me3.

299

300 **Supplementary Figure 1.** Comparison of RNA-seq quantification per gene on the 2008 (33  
301 scaffold/chromosomes) and 2021 (25 chromosomes) assembled genomes. Two RNA-seq  
302 replicates were used.

303

304 **Supplementary Table 1.** List of the genes not recovered on the lifted annotation with their  
305 coordinates and features.

306

307 **Supplementary File 1.** Supplementary materials and methods.

308

309 **Supplementary File 2.** GFF3 file annotating *Phaeodactylum tricornutum* 2021 assembly  
310 with Phatr3 lifted genes.

311

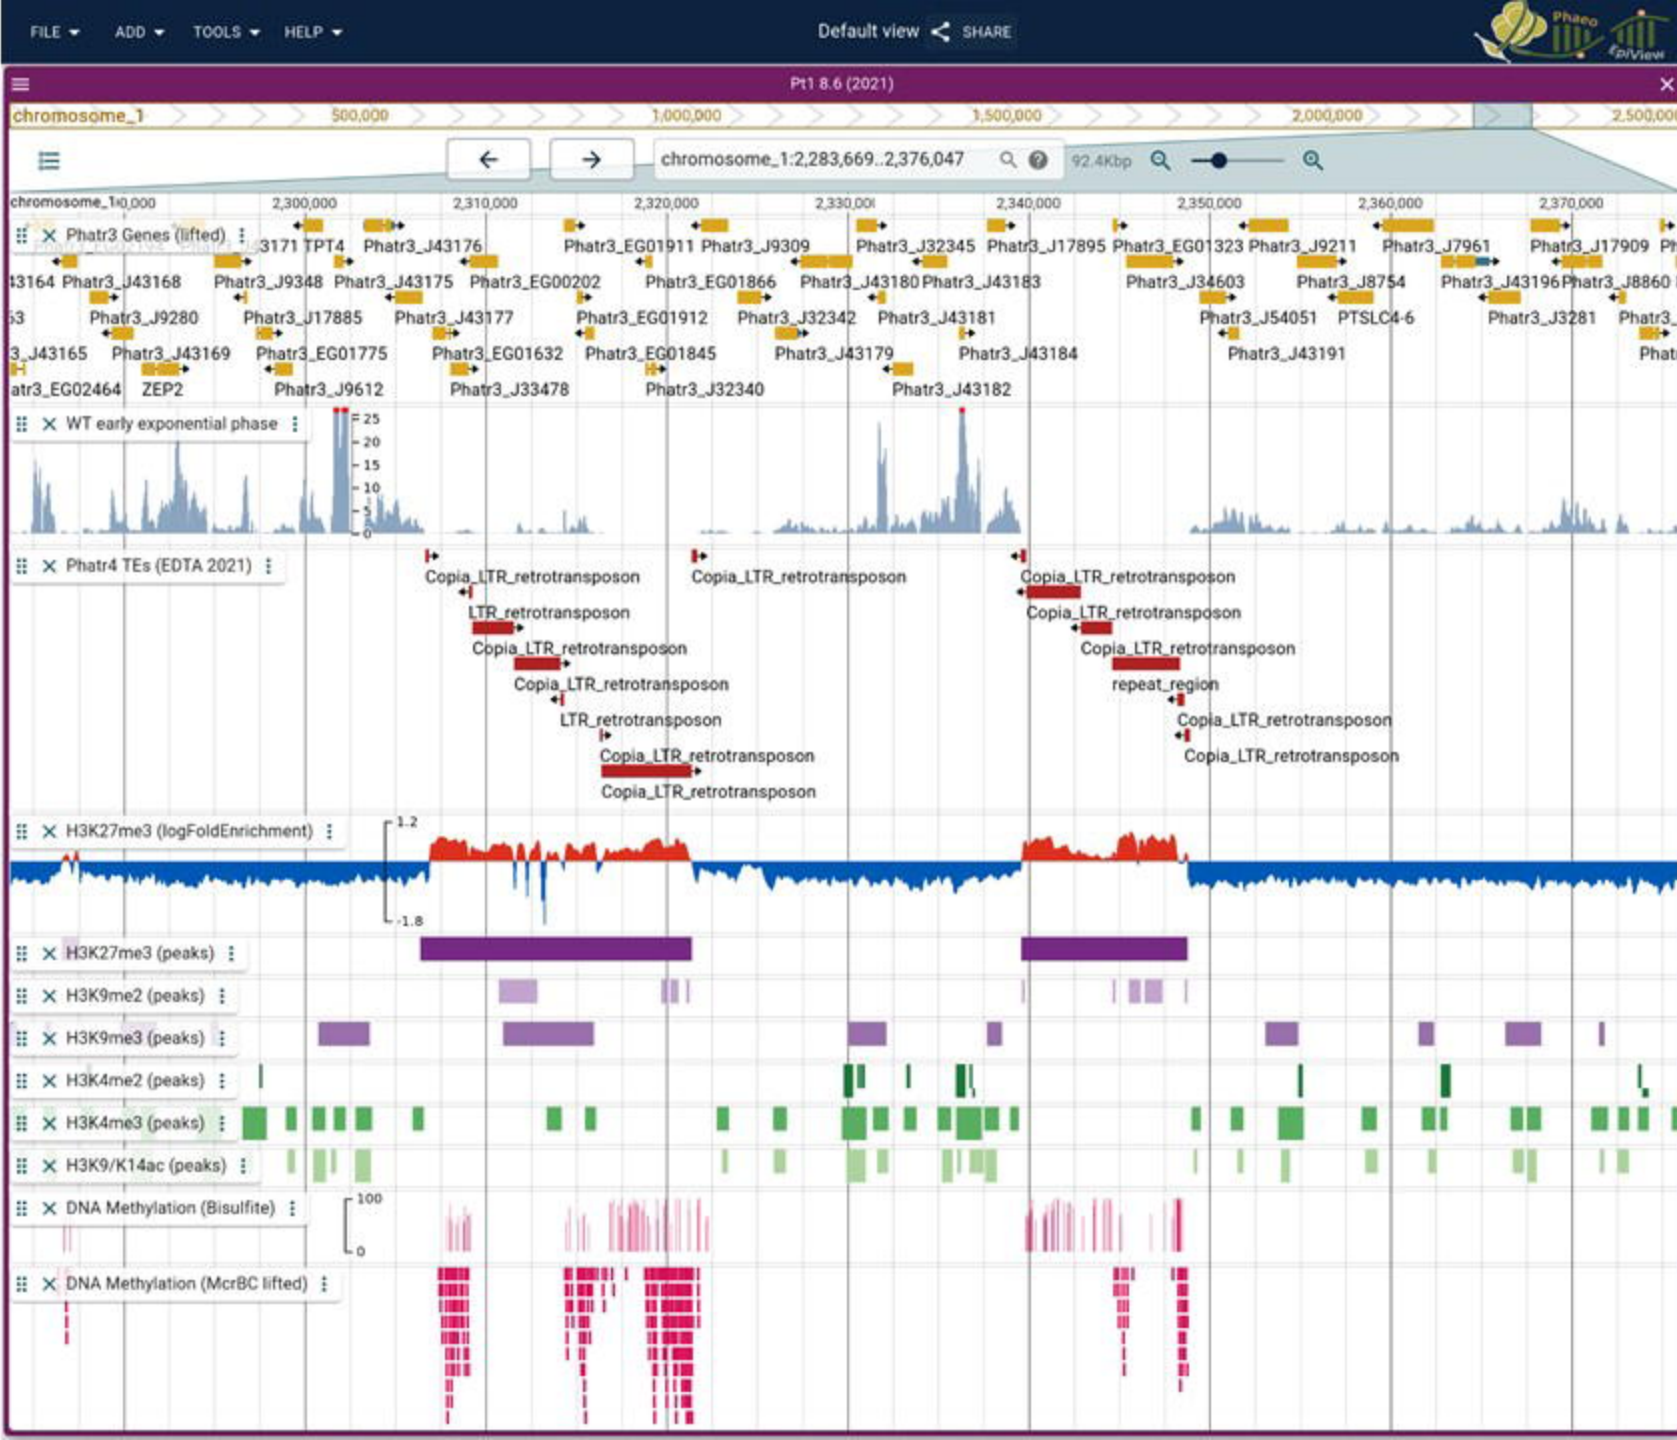

Source: https://www.biorxiv.org/content/biorxiv/early/2022/08/01/2022.07.29.502047.full.pdf
